# Supplementary figures and images for: Multifibrillar bundles of a self-assembling hyaluronic acid derivative obtained through a microfluidic technique for aortic smooth muscle cell orientation and differentiation
Source: Royal Society of Chemistry journal article supplement (doi:10.1039/c8bm00647d), 2018-01-01

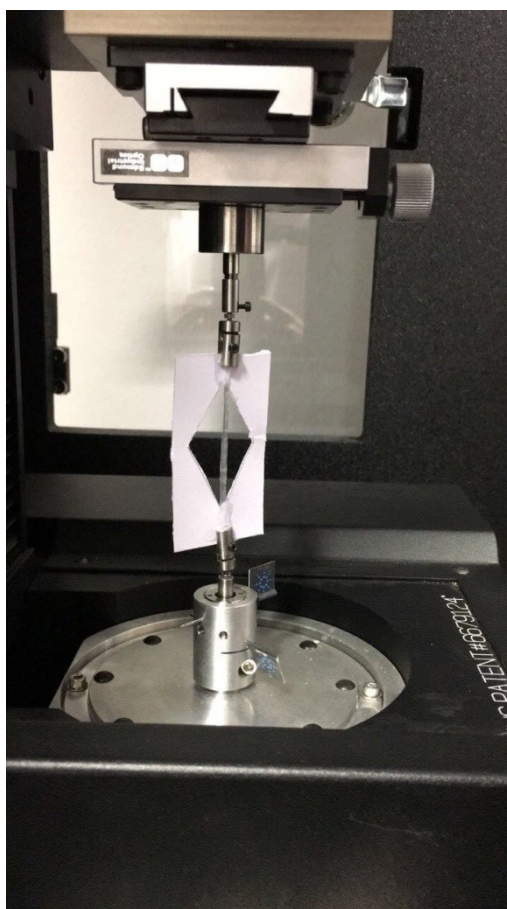

Figure S1. Picture of the apparatus and experimental set-up employed for the mechanical test.

Supplement: c8bm00647d1.pdf [file c8bm00647d1.pdf]
